- on anti-epileptic treatment. *Acta Paediatr* 2015; 104: 123–9
38. Vanhatalo S, Palva JM, Andersson S, Rivera C, Voipio J, Kaila K: Slow endogenous activity transients and developmental expression of K<sup>+</sup>-Cl<sup>-</sup> cotransporter 2 in the immature human cortex. *Eur J Neurosci* 2005; 22:2799–804
  39. Hyde TM, Lipska BK, Ali T, Mathew SV, Law AJ, Metitiri OE, Straub RE, Ye T, Colantuoni C, Herman MM, Bigelow LB, Weinberger DR, Kleinman JE: Expression of GABA signaling molecules KCC2, NKCC1, and GAD1 in cortical development and schizophrenia. *J Neurosci* 2011; 31:11088–95
  40. Sedmak G, Jovanov-Milošević N, Puskarjov M, Ulamec M, Krušlin B, Kaila K, Judaš M: Developmental expression patterns of KCC2 and functionally associated molecules in the human brain. *Cereb Cortex* 2016; 26:4574–89
  41. Kaila K, Ruusuvuori E, Seja P, Voipio J, Puskarjov M: GABA actions and ionic plasticity in epilepsy. *Curr Opin Neurobiol* 2014; 26:34–41

## ANESTHESIOLOGY REFLECTIONS FROM THE WOOD LIBRARY-MUSEUM

### Ethereal Notes from Morrisville, Vermont: J. A. Robinson and Maria von Trapp

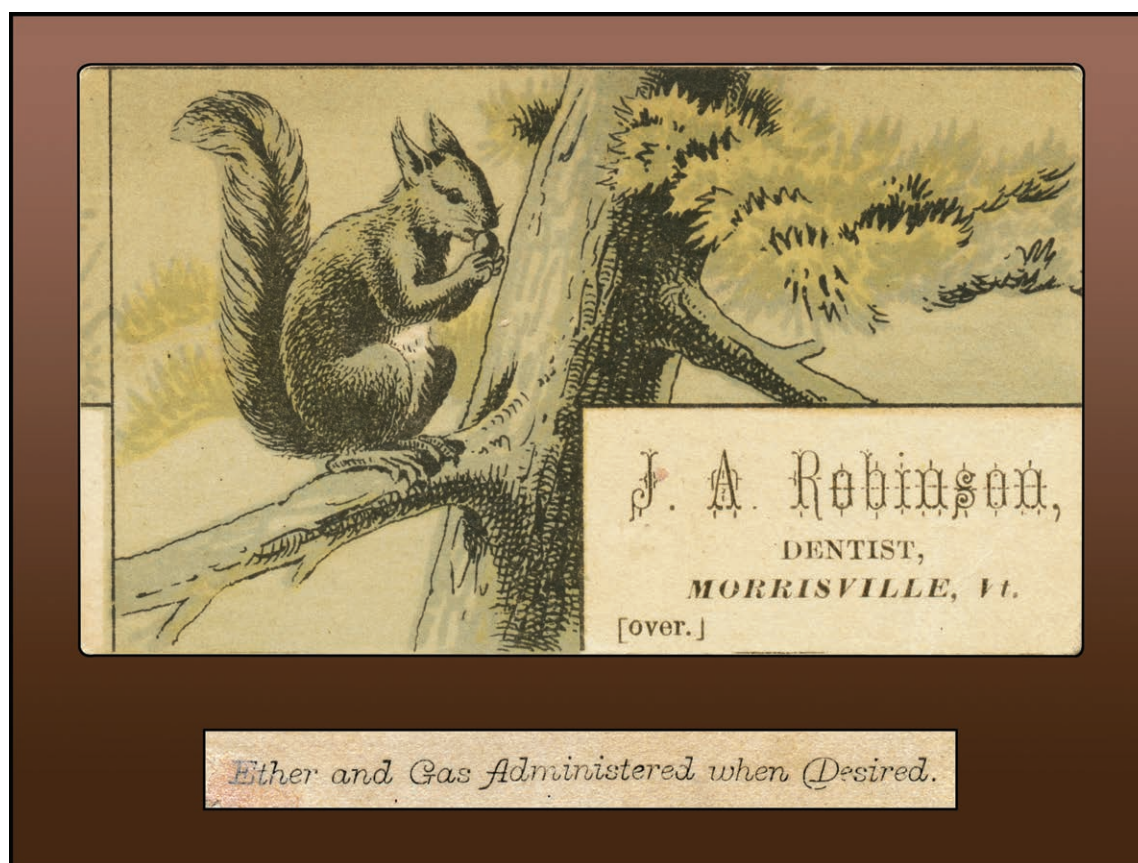

Dr. James Arthur Robinson (1856 to 1926) spent nearly his entire life in Morrisville, Vermont, about nine miles northeast of Stowe. On the reverse of his trade card from the Wood Library-Museum's Ben Z. Swanson Collection, Robinson advertised that "Ether and Gas [would be] Administered when Desired" (*bottom*). He specialized in anesthesia and dentistry in the "care of Children..." Perhaps the acorn-eater depicted on the obverse of Robinson's trade card (*top*) was one of the Morrisville squirrels serenaded by Robinson and fellow members of his Silver Cornet Band. Descendants of those squirrels may have listened to the "Sound of Music" from surviving Trapp Family Singers visiting Morrisville friends or with stepmother and mother Maria von Trapp (1905 to 1987). Baroness von Trapp died in Morrisville in 1987, about 22 years after Julie Andrews played her role in Rodgers and Hammerstein's movie, *The Sound of Music*. (Copyright © the American Society of Anesthesiologists' Wood Library-Museum of Anesthesiology.)

George S. Bause, M.D., M.P.H., Honorary Curator and Laureate of the History of Anesthesia, Wood Library-Museum of Anesthesiology, Schaumburg, Illinois, and Clinical Associate Professor, Case Western Reserve University, Cleveland, Ohio. UJYC@aol.com.
